# Supplementary material for: The somatically generated portion of T cell receptor CDR3α contributes to the MHC allele specificity of the T cell receptor
Source: eLife. 2017 Nov 17;6:e30918. doi: 10.7554/eLife.30918 (PMC5701794; doi:10.7554/eLife.30918)
Supplement: Figure 1—source data 1. — The numbers of thymus and lymph node cells were counted and analyzed for their expression of CD4 and CD8 and T cell receptor. [file elife-30918-fig1-data1.xlsx]

## Sheet: Sheet1
Figure 1-source data 1
		Thymus data										LN data
Mouse	Strain	Sex	# thymocytes (x10-7)	# LN cells (x10-7)	% DN	% DP	%CD4	% CD8	# CD4 TCRhi x 10-6	# CD8 TCRhi x 10-6		% CD4	% of CD4 CD44hi	% CD8	% of CD8 CD44hi	% CD4- CD8- that are Kbpos
1485	bb d- DOBWT BT1	F	22.9494	3.06176	2.17	72.5	7.99	7.81	16.888	0.275393		59.4	4.8	16	5.87	78.1
1486	bb d- DOBWT BT1	F	29.4899	3.94464	5.11	79.3	9.7	3.18	26.517	2.74769		58	5.04	22.3	4.66	82.1
1488	bb d- DOBWT BT1	M	17.4339	4.96768	8.43	76.2	6.77	4.38	10.5871	1.34395		59	4.66	14.3	10.3	81
	Average		23.2911	3.99136	5.23667	76	8.15333	5.12333	17.9974	1.45568		58.8	4.83333	17.5333	6.94333	80.4
	St err		3.48859	0.55134	1.81036	1.96787	0.850759	1.38892	4.63741	0.716723		0.416827	0.111087	2.43622	1.71633	1.19445
	st dev		4.93286	0.779595	2.55985	2.78256	1.20297	1.96394	6.55729	1.01345		0.589393	0.157077	3.44481	2.42689	1.68895
1474	ff d- DOBWT BT2	F	28.3578	7.24288	4.12	84.3	5.82	3.39	14.6227	2.47061		44.1	7.67	31.8	10.9	2.07
1476	ff d- DOBWT BT2	F	26.528	5.15552	4.64	83.3	7.32	2.38	17.1854	2.74013		43.4	6.36	32.5	6.71	0.79
1480	ff d+ DOBWT BT1	M	9.6032	5.61344	2.71	86.5	8.45	0.41	7.10037	0.271281		44.2	7.14	28.1	12.6	0.87
	Average		21.4963	6.00395	3.82333	84.7	7.19667	2.06	12.9695	1.82734		43.9	7.05667	30.8	10.07	1.24333
	St err		5.97705	0.634165	0.577235	0.946284	0.762619	0.876042	3.02996	0.782838		0.251959	0.380904	1.36666	1.75228	0.414469
	st dev		8.45155	0.896709	0.81621	1.33804	1.07834	1.23872	4.28436	1.10693		0.356271	0.538598	1.93245	2.47773	0.586059
1461	ss d+ DOBWT	F	24	15	6.68	81.2	8.18	2.78	15.2344	5.20416		35.4	10.4	30.7	7.18	0.43
1462	ss d+ DOBWT	M	17	12	4.25	84.7	7.59	2.38	12.0256	3.4391		33.8	11.1	29.9	7.18	0.84
1464	ss d+ DOBWT	M	16	7.3	5.2	83.1	8.01	2.64	12.1368	3.45523		32.7	13	31.6	9.44	0.86
	Average		19	11.4333	5.37667	83	7.92667	2.6	13.1323	4.03283		33.9667	11.5	30.7333	7.93333	0.71
	St err		2.51959	2.24344	0.707858	1.0128	0.175549	0.117328	1.05282	0.586377		0.784794	0.777666	0.491613	0.754226	0.140285
	st dev		3.56271	3.17222	1.00091	1.4321	0.248226	0.165902	1.48869	0.829138		1.1097	1.09962	0.69514	1.06648	0.198363
1534	bb d+ DOBY48A	M	5.84768	4.49856	2.44	92.7	3.17	0.096	1.20677	0.0280689		26.9	17.4	25.8	28.4	94.4
1535	bb d+ DOBY48A	M	13.9798	3.05984	2.68	93.9	2.05	0.22	1.94592	0.163312		27.4	18.7	24.8	16.1	89
1536	bb d+ DOBY48A	M	11.392	5.20448	2.5	94.3	1.98	0.11	1.42104	0.0537588		27.7	19	27.5	27	93.1
	Average		10.4065	4.25429	2.54	93.6333	2.4	0.142	1.52458	0.0817134		27.3333	18.3667	26.0333	23.8333	92.1667
	St err		2.40155	0.631784	0.0721965	0.48131	0.385987	0.0392553	0.219826	0.0415172		0.23361	0.491613	0.78904	3.89234	1.62913
	st dev		3.39579	0.893343	0.102086	0.680572	0.545786	0.055507	0.310835	0.0587054		0.330324	0.69514	1.1157	5.50377	2.30359
1542	ff d- DOBY48A BT1	M	6.8096	5.24416	4.03	91.1	2.75	0.27	1.38575	0.0658216		19.8	28.8	28.5	17	0.87
1543	ff d- DOBY48A BT1	M	5.01696	1.67072	3.77	91.4	3.1	0.32	1.21777	0.105477		20.1	25.9	29.3	16.5	0.62
1544	ff d- DOBY48A BT1	M	5.75648	5.3328	3.62	91	3.27	0.22	1.51907	0.0740859		16.6	29.6	27.2	21	0.78
	Average		5.86101	4.08256	3.80667	91.1667	3.04	0.27	1.3742	0.0817947		18.8333	28.1	28.3333	18.1667	0.756667
	St err		0.52074	1.20762	0.11991	0.120328	0.153261	0.0289017	0.0872743	0.0120932		1.12135	1.12531	0.612644	1.42569	0.0731924
	st dev		0.736326	1.70758	0.169553	0.170143	0.216711	0.0408671	0.123406	0.0170998		1.58559	1.59119	0.866279	2.01592	0.103494
1498	ss d+ DOBY48A	M	13	9.4	7.55	87.8	1.82	1.79	2.04422	1.69406		11.2	24.2	39.7	17.3	1.35
1499	ss d+ DOBY48A	M	12	8.5	5.83	90.1	1.53	1.88	1.65791	1.53408		13.5	21.9	40	15.4	0.58
1500	ss d+ DOBY48A	M	7.7	7	6.72	88.7	1.44	1.94	0.912542	0.973958		12.8	21.7	42.7	13.4	0.34
	Average		10.9	8.3	6.7	88.8667	1.59667	1.87	1.53822	1.4007		12.5	22.6	40.8	15.3667	0.756667
	St err		1.62776	0.70083	0.497211	0.669955	0.114785	0.0436407	0.332518	0.218569		0.681493	0.803031	0.95507	1.12729	0.30501
	st dev		2.30165	0.990973	0.703056	0.947317	0.162306	0.0617079	0.47018	0.309057		0.963631	1.13549	1.35047	1.59399	0.431285
