# Supplementary material for: The somatically generated portion of T cell receptor CDR3α contributes to the MHC allele specificity of the T cell receptor
Source: eLife. 2017 Nov 17;6:e30918. doi: 10.7554/eLife.30918 (PMC5701794; doi:10.7554/eLife.30918)
Supplement: Figure 2—source data 1. — CD4 T cells were isolated from individual DOb48A mice and transduced with retorviruses expressing DObWT or DOb48A as described in the Methods section. The cells were vultured with spoleen cells from mice expressing various MHC alleles and responses assessed one day later by measuring the % of cells that bore CD69. Data shown are from individual mice assayed on different days. [file elife-30918-fig2-data1.xlsx]

## Sheet: Sheet1
Figure 2-source data 2
		Response of cells transfected with DObWT retrovius minus response of cells transfected with DOb48A retrovirus
		Stimulating cells
Mouse number	Genotype of transduced T cells	None	H-2b	H-2f	H-2s
1064	H2b DOb48A	-0.9	8.69	0.11	0.14
1067	H2b DOb48A	-0.79	23.96	1.55	0.68
1230	H2b DOb48A	-0.44	18.57	2.13	10.86
	Average	-0.71	17.0733	1.26333	3.89333
	St Err	0.138849	4.47644	0.601193	3.49095
1115	H2f DOb48A	-2.31	0.23	5.17	0.14
1142	H2f DOb48A	0.35	5.01	20.44	8.99
1148	H2f DOb48A	-1.31	6.57	9.6	7.2
	Average	-1.09	3.93667	11.7367	5.44333
	St Err	0.776634	1.90952	4.54106	2.70475
1027	H2s DOb48A	-0.36	8.9	2.77	3.96
1183	H2s DOb48A	-0.98	2.89	2.84	4.48
1185	H2s DOb48A	-0.28	-0.58	-1.92	0.76
	Average	-0.54	3.73667	1.23	3.06667
	St Err	0.221471	2.77247	1.577	1.16444
