# Supplementary material for: The somatically generated portion of T cell receptor CDR3α contributes to the MHC allele specificity of the T cell receptor
Source: eLife journal article supplement (doi:10.7554/elife.30918), 2017-11-17
Supplement: supp [file elife-30918-supp-v1.zip]

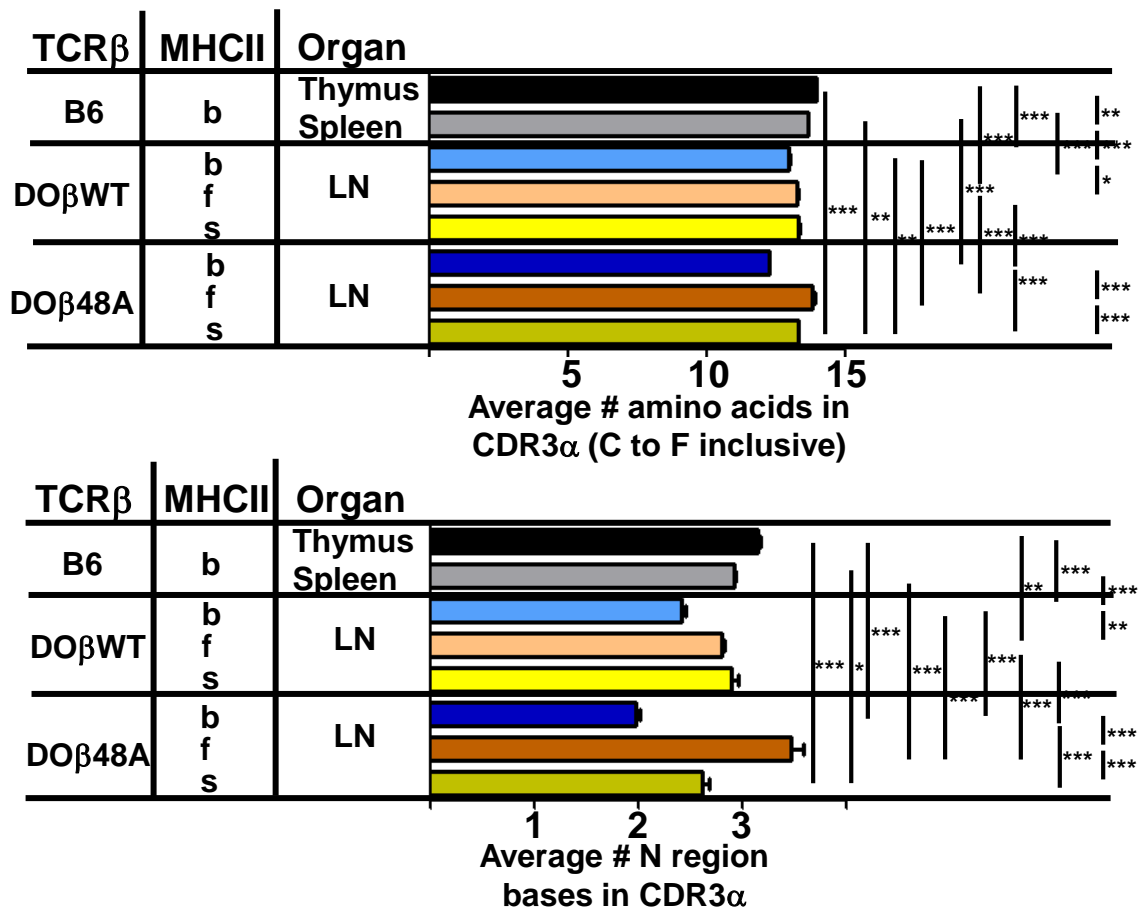

**Figure 7-figure supplement 1. CDR3α length on naïve CD4 T cells depends upon the selecting MHC allele and the co-selected TCRβ.** Data were obtained as described in Figures. 3 and 4. Shown are the average lengths of CDR3α and N region bases on naïve CD4 T cells coexpressed with the indicated TCRβ. Results are the means and SEMs of 3 mice of the same haplotype except for s DOβWT mice, in which case the results from 2 mice were averaged. Errors are calculated with one way ANOVA with the Bonferroni post test comparing all pairs. \* =  $p < 0.05$ , \*\* =  $p < 0.01$ , \*\*\* =  $p < 0.001$ . Statistical results are omitted for pairs which were not significantly different from each other.
