# Supplementary material for: The somatically generated portion of T cell receptor CDR3α contributes to the MHC allele specificity of the T cell receptor
Source: eLife journal article supplement (doi:10.7554/elife.30918), 2017-11-17
Supplement: supp [file elife-30918-supp-v1.zip]

**Frequency of amino acid use in CDR3 $\alpha$ s with lengths (between the C terminal TRAV C and the TRAJ conserved F/W/L inclusive) of:**

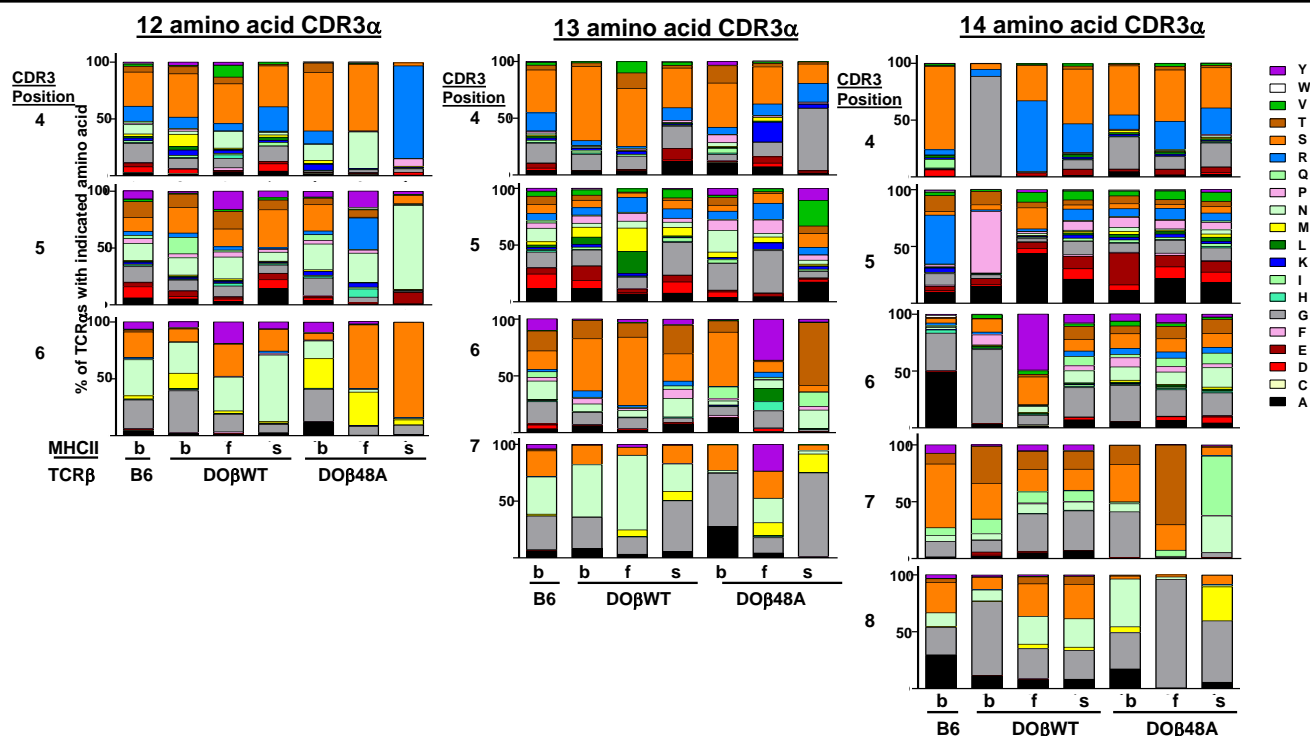

**Figure 8-figure supplement 2. The frequency of amino acid use in CDR3 $\alpha$  use on naïve CD4 T cells depends on the selecting MHCII allele, the coselected TCR $\beta$  and the length of the CDR3 $\alpha$ .** Data from TCR $\alpha$  sequences obtained as in Figure 4 were used to analyze the frequency with which different amino acids were used at different positions.
