# Supplementary material for: The somatically generated portion of T cell receptor CDR3α contributes to the MHC allele specificity of the T cell receptor
Source: eLife journal article supplement (doi:10.7554/elife.30918), 2017-11-17
Supplement: supp [file elife-30918-supp-v1.zip]

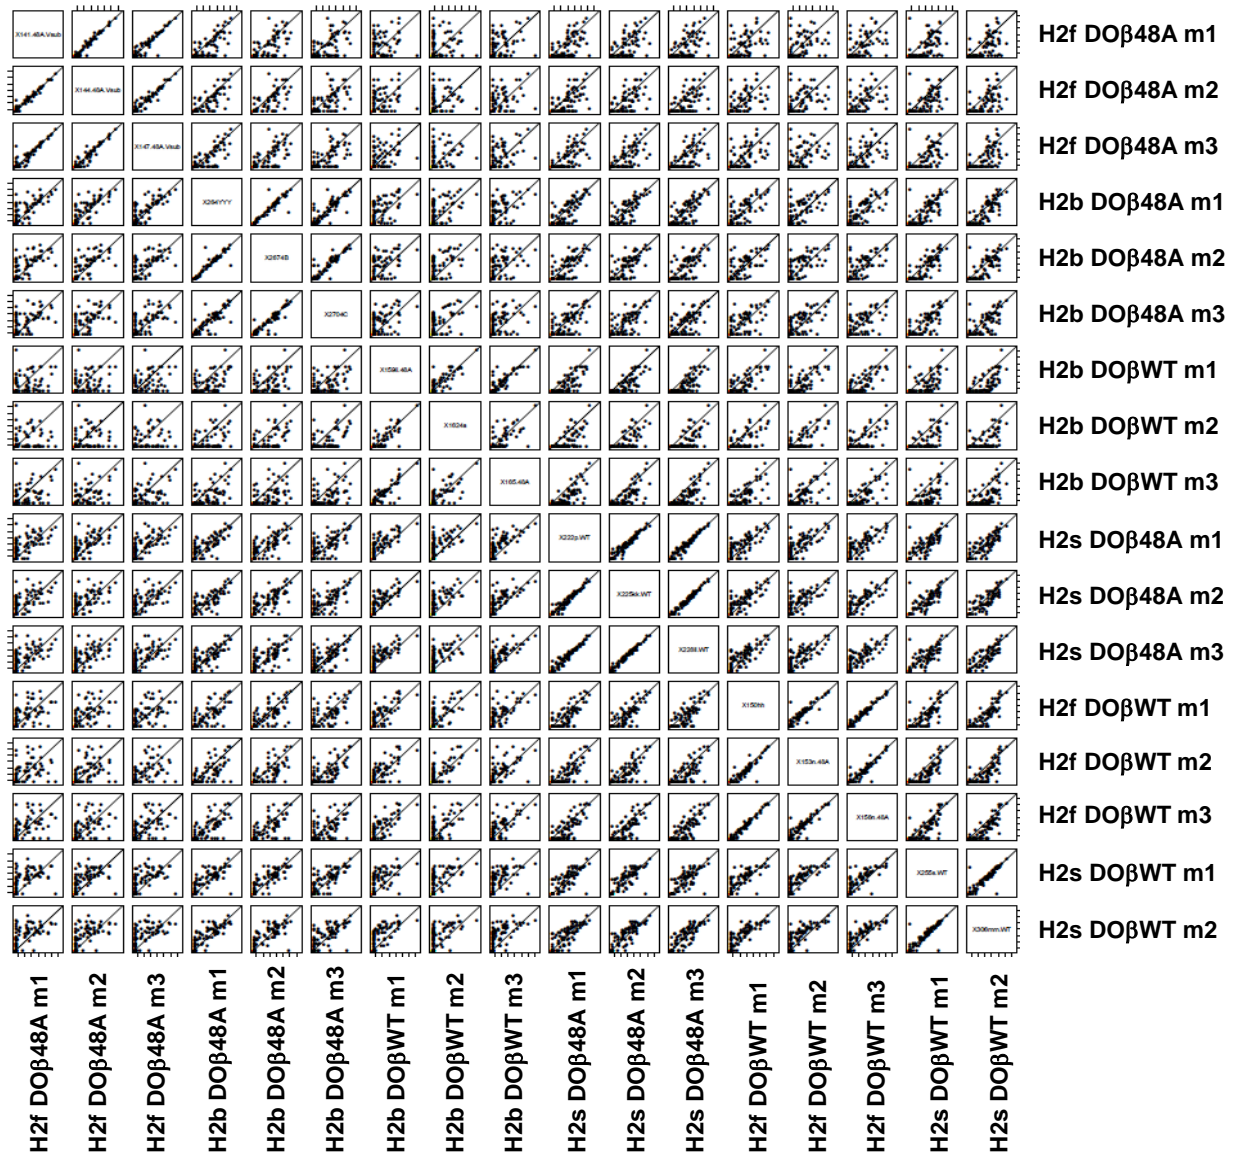

**Figure 5-figure supplement 2. TRAV usage by naive CD4 T cells depends on the selecting MHCII allele and partner TCR $\beta$ .** Pairwise scatter plots of individual TRAV frequencies between all replicates of mature naïve CD4 T cells from mice expressing different MHCII alleles and different TCR $\beta$  chains. Data are plotted as log2 transformed TRAV counts per  $1 \times 10^4$  total TCR $\alpha$  sequences in each mouse noted on the x axis versus each mouse noted on the y axis. Values distributed along the diagonal are equivalent between the two mice compared in the plot. Individual mice of each genotype were numbered m1-m3, numbers for each mouse are used consistently throughout.
