# Supplementary material for: The somatically generated portion of T cell receptor CDR3α contributes to the MHC allele specificity of the T cell receptor
Source: eLife journal article supplement (doi:10.7554/elife.30918), 2017-11-17
Supplement: supp [file elife-30918-supp-v1.zip]

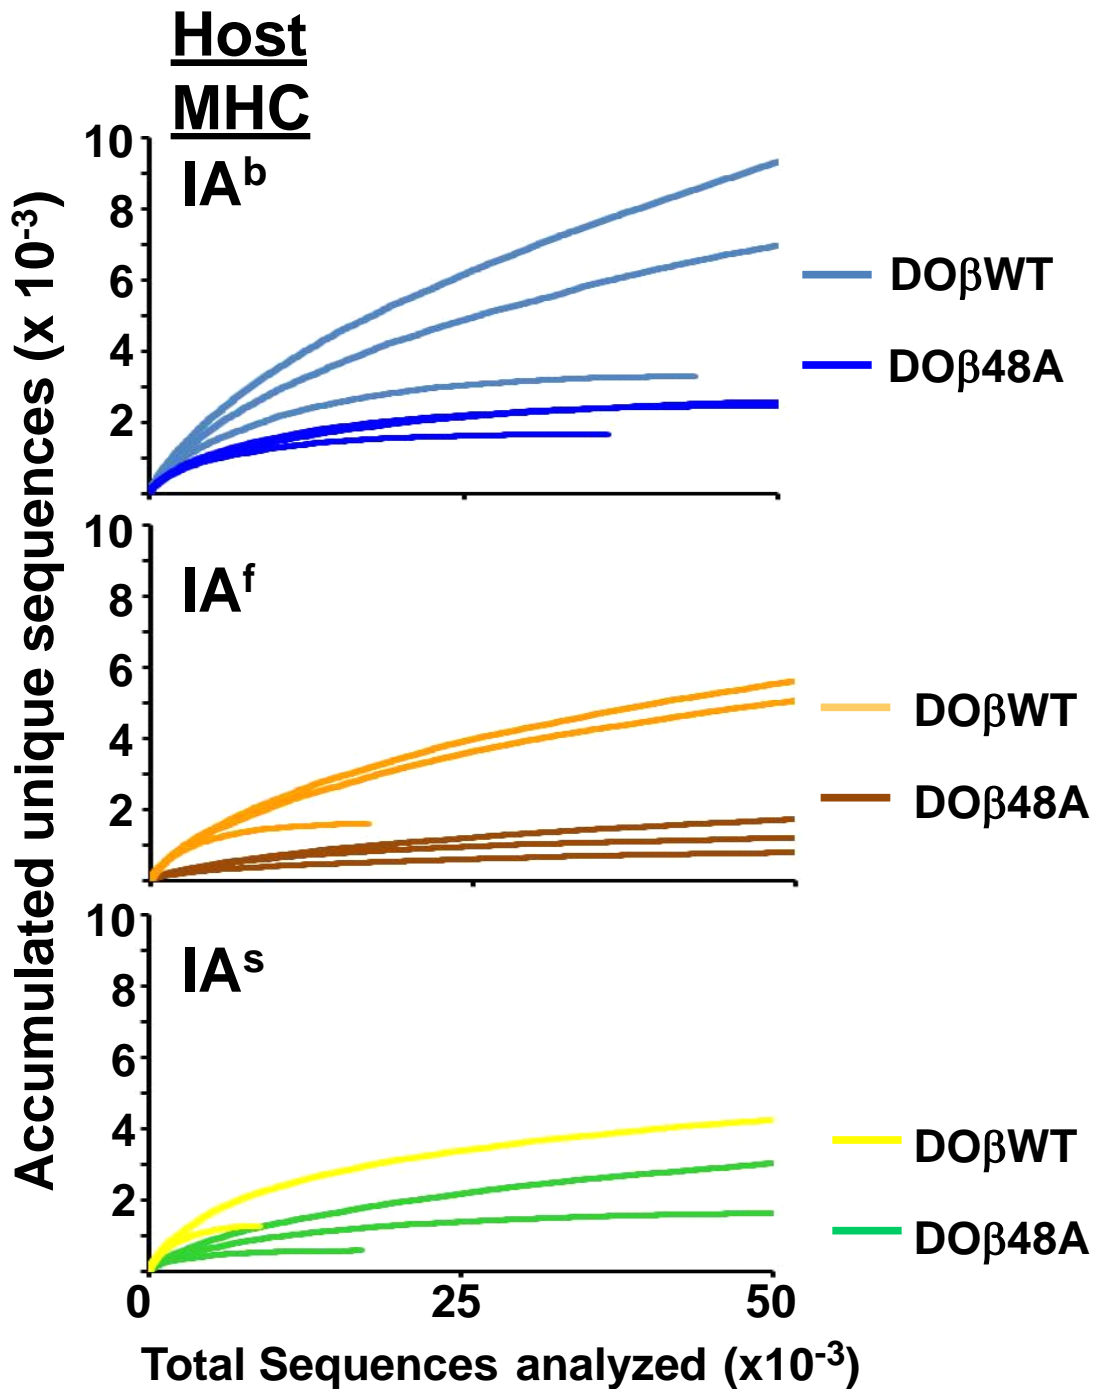

**Figure 3-figure supplement 1** The naïve CD4 T cells in mice expressing a single TCR $\alpha$  chain express a limited number of TCR $\alpha$  sequences regardless of the MHC allele involved in their selection in the thymus. Results were calculated as described in Figure 3. Data shown are for individual mice.
