# Supplementary material for: The somatically generated portion of T cell receptor CDR3α contributes to the MHC allele specificity of the T cell receptor
Source: eLife journal article supplement (doi:10.7554/elife.30918), 2017-11-17
Supplement: supp [file elife-30918-supp-v1.zip]

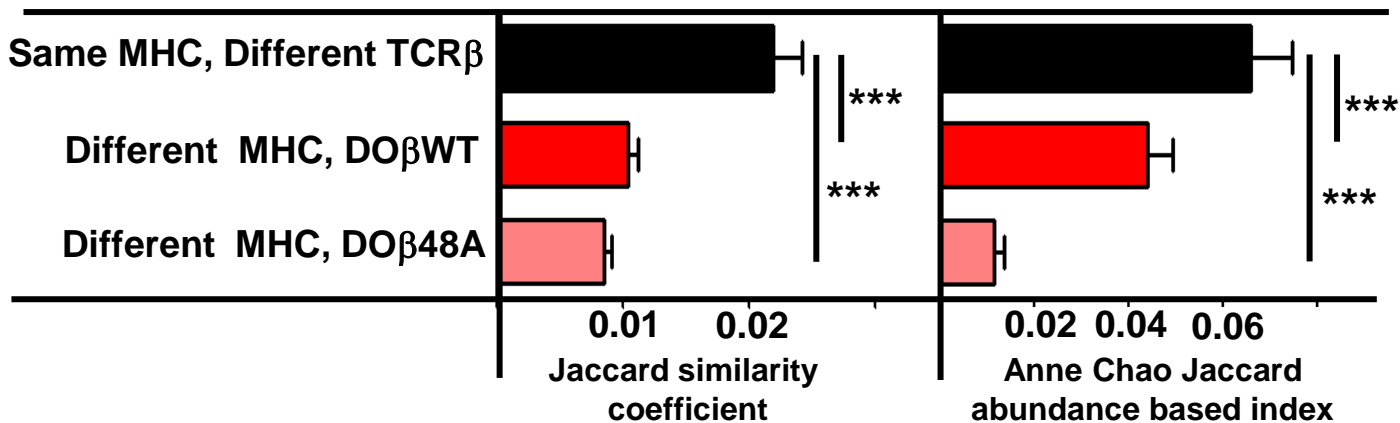

**Figure 4-figure supplement 1** TCR $\alpha$  sequences are somewhat more likely to be shared between T cells selected on the same MHCII allele but differing in TCR $\beta$  than between T cells sharing TCR $\beta$  but selected on different MHCII alleles. TCR $\alpha$  sequences were obtained and analyzed as described in Figure 4. Data shown are combined as indicated between all the mice illustrated in Figure 4. Results are the means and SEMs of the data. \*\*\*p<0.001 by one way ANOVA with Newman Keuls post analysis.
