# Supplementary material for: The somatically generated portion of T cell receptor CDR3α contributes to the MHC allele specificity of the T cell receptor
Source: eLife journal article supplement (doi:10.7554/elife.30918), 2017-11-17
Supplement: supp [file elife-30918-supp-v1.zip]

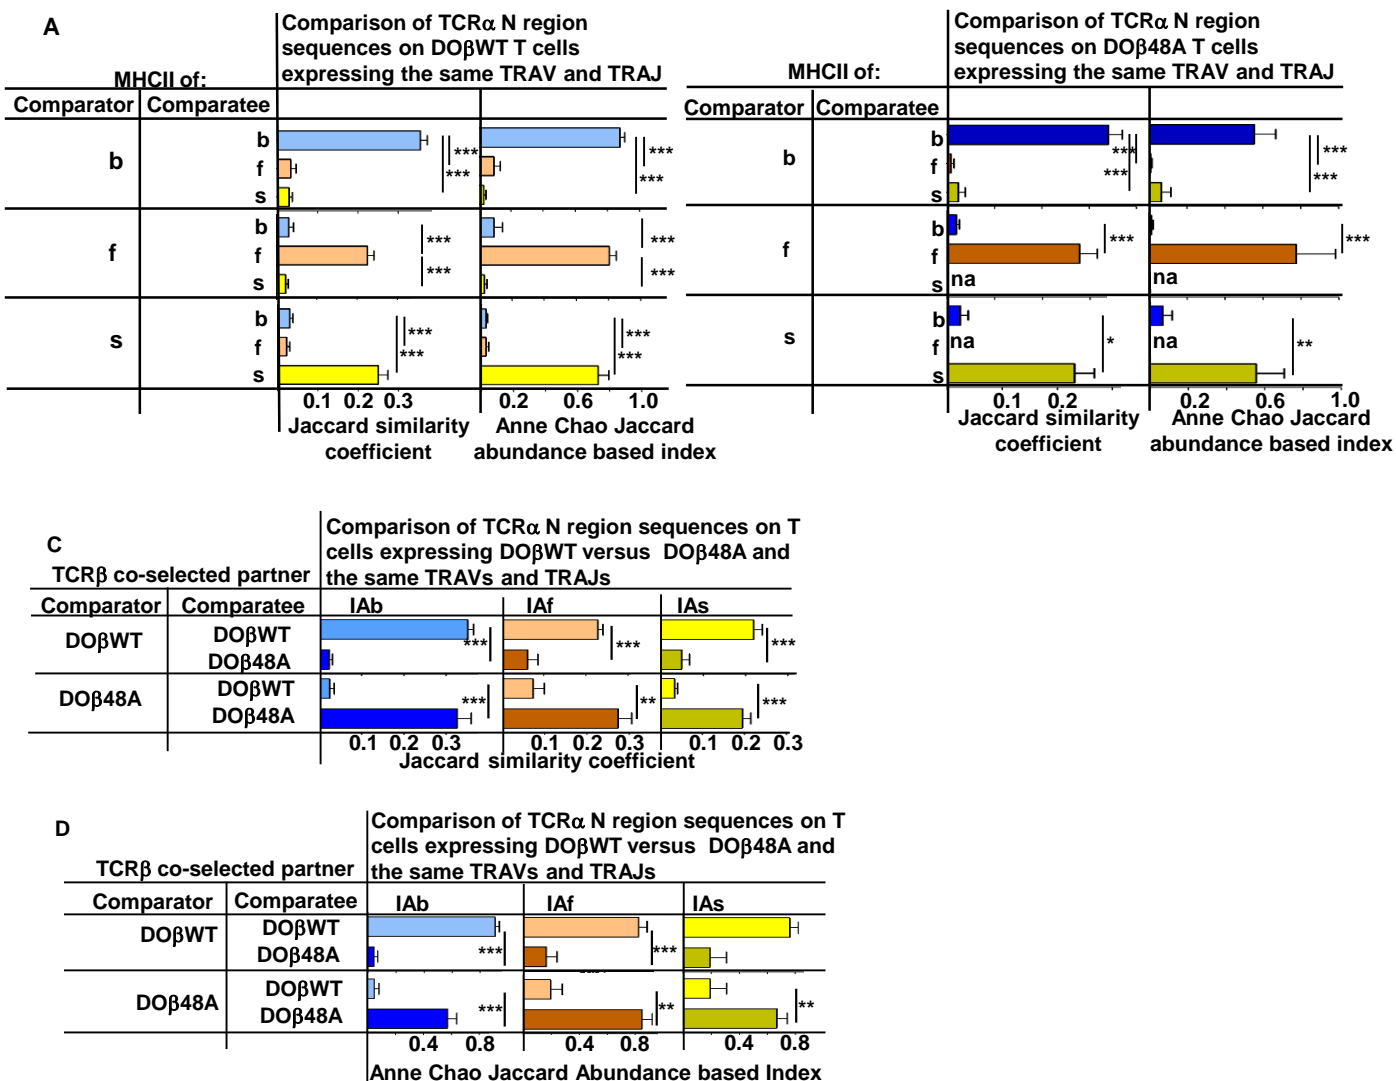

**Figure 8-figure supplement 1. N region amino acids in CDR3 $\alpha$  of naïve CD4 T cells are determined by the selecting MHCII allele and the co-selected TCR $\beta$ .** TCR $\alpha$ s on naïve CD4 T cells of mice expressing a single TCR $\beta$  and various MHCII alleles were sequenced as described in Figures 3 and 4. Mice were as listed in those Figures. The results of samples expressing the same TRAV TRAJ pairs for all comparisons in which each mouse expressed at least 5 different sequences involving the chosen TRAV/TRAJ pair were averaged. Results shown are the means  $\pm$  SEMs of the data from mice of identical genotypes. Statistical analyses for comparisons involving 3 different types of mice used one way ANOVA tests with Newman-Keuls post test analyses. Student t tests were used to analyze statistically the differences between pairs of mice. \*\* $p < 0.01$ , \*\*\* $p < 0.001$ .
