# Supplementary material for: The somatically generated portion of T cell receptor CDR3α contributes to the MHC allele specificity of the T cell receptor
Source: eLife journal article supplement (doi:10.7554/elife.30918), 2017-11-17
Supplement: supp [file elife-30918-supp-v1.zip]

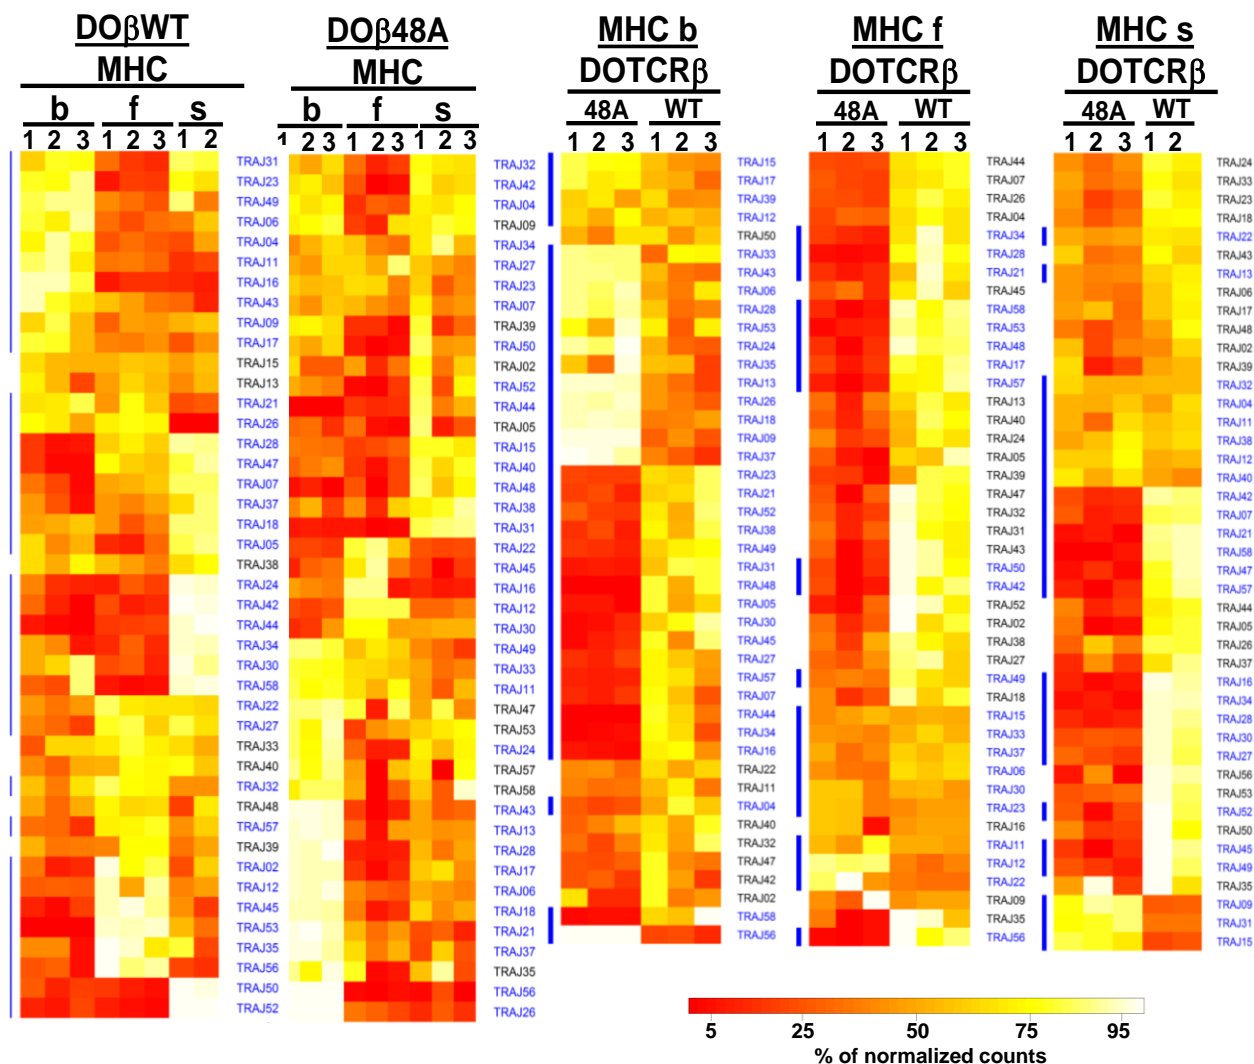

**Figure 6-figure supplement 2** TRAJs are used to different extents by naïve CD4 T cells in mice expressing different MHCII alleles and/or different TCRβs. Data were obtained and analyzed as described in Figures 3 and 5. DESeq 2 was used as described in Figure supplement 5 to compare the frequencies with which different TRAJs were used by naïve CD4 T cells in mice expressing different MHCII alleles and/or different TCRβs.
