# Supplementary material for: The somatically generated portion of T cell receptor CDR3α contributes to the MHC allele specificity of the T cell receptor
Source: eLife journal article supplement (doi:10.7554/elife.30918), 2017-11-17
Supplement: supp [file elife-30918-supp-v1.zip]

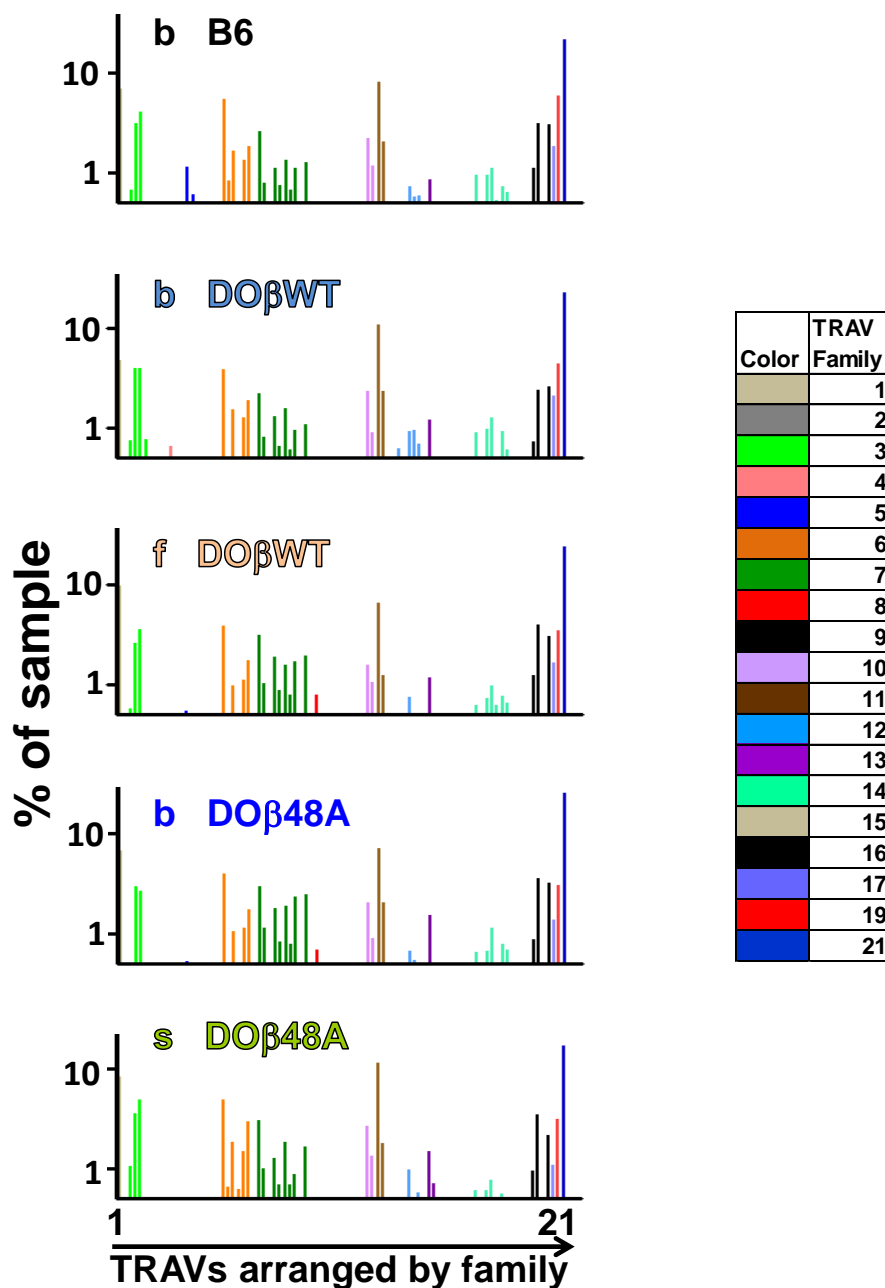

**Figure 5-figure supplement 1. Different TRAVs are detected at different frequencies in preselection thymocytes.** Preselection DP thymocytes were obtained from individual mice expressing the indicated MHCII alleles and TCRβs. Shown are the %s with which individual TRAVs were detected. Subfamily members of each family are color coded as shown. Note, the TRAVs are ordered by family and not by their position in the TCRα locus.
