# Supplementary material for: The somatically generated portion of T cell receptor CDR3α contributes to the MHC allele specificity of the T cell receptor
Source: eLife. 2017 Nov 17;6:e30918. doi: 10.7554/eLife.30918 (PMC5701794; doi:10.7554/eLife.30918)
Supplement: Supplementary file 1. — Naïve CD4 T cells were isolated from the lymph nodes of normal mice of the indicated strains and their TCRα sequences identified as described in the Materials and methods section. Shown are the %s of unique sequences and the %s of total sequences that were shared between pairs of mice of the indicated strains. Data were obtained from three independently sequenced B6 mice and one each B6.AKR and B6.NOD animals and are the means and standard errors of the means of the comparisons. [file elife-30918-supp1.xlsx]

## Sheet: Sheet1
Supplementary File 1
In normal mice, a significant number of TCRa sequences appear on naïve CD4 T cells regardless of the selecting MHCII allele
% of unique sequences in:	That are also found in:
	B6	B6.AKR	B6.NOD
B6 (IAb)	35.9+/-4.6	18.9+/-2.9	10.3+/-1.6
B6.AKR (IAk IEk)	35.8+/-2.8		12.2
B6.NOD (IAg7)	36.6+/-2.8	23.1
% of total sequences in:	That are also found in:
	B6	B6.AKR	B6.NOD
B6 (IAb)	62.1+/-2.9	44.1+/-2.5	26.7+/-1.6
B6.AKR (IAk IEk)	57.8+/-2.1		27
B6.NOD (IAg7)	54.9+/-2.1	41.2
Naïve CD4 T cells were isolated from the lymph nodes of normal mice of the indicated strains and their TCRa sequences identified as described in the Methods section. Shown are the %s of unique sequences and the %s of total sequences that were shared between pairs of mice of the indicated strains. Data were obtained from 3 independently sequenced B6 mice and one each B6.AKR and B6.NOD animals and …
