# Supplementary material for: The somatically generated portion of T cell receptor CDR3α contributes to the MHC allele specificity of the T cell receptor
Source: eLife. 2017 Nov 17;6:e30918. doi: 10.7554/eLife.30918 (PMC5701794; doi:10.7554/eLife.30918)
Supplement: Supplementary file 2. [file elife-30918-supp2.xlsx]

## Sheet: Sheet1
Supplementary File 2
Sequences of TCRb transgenes
Name	TRBV (Arden nomenclature)	CDR3	TRBJ
DObWT	13.2 (Vb8.2)	CASGSGTTNTEVFF	1.1
DOb48A	13.2 (Vb8.2 with Y48 mutated to A)	CASGSGTTNTEVFF	1.1
